# Supplementary material
Source: PubMed Central journal article supplement (PMC7367715)
Supplement: NIHMS1579935-supplement-2.pdf [file NIHMS1579935-supplement-2.pdf]

| KRAS cancer data         |        |        |      |            |        |      |        |        |      |        |        |      |
|--------------------------|--------|--------|------|------------|--------|------|--------|--------|------|--------|--------|------|
| Cancer type              | COSMIC |        |      | cBioportal |        |      | ICGC   |        |      | TCGA   |        |      |
|                          | mutant | tested | %    | mutant     | tested | %    | mutant | tested | %    | mutant | tested | %    |
| LARGE INTESTINE          | 25,095 | 75,673 | 33.2 | 1,088      | 3,089  | 35.2 | 271    | 669    | 40.5 | -      | -      | -    |
| colon adenocarcinoma     | 2,980  | 9,619  | 31.0 | 190        | 469    | 40.5 | 112    | 254    | 44.0 | 174    | 400    | 43.5 |
| rectal adenocarcinoma    | 1,214  | 3,453  | 35.2 | 92         | 209    | 44.0 | 41     | 94     | 43.6 | 57     | 137    | 41.6 |
| LUNG                     | 7,080  | 40,940 | 17.3 | 800        | 3,771  | 18.9 | 19     | 412    | 4.6  | -      | -      | -    |
| adenocarcinoma           | 4,163  | 19,921 | 20.9 | 766        | 2,708  | 25.0 | 15     | 208    | 7.2  | 157    | 567    | 27.9 |
| non-small cell carcinoma | 2,250  | 10,961 | 20.5 | 14         | 54     | 25.9 | -      | -      | -    | -      | -      | -    |
| small cell carcinoma     | 22     | 1,037  | 2.1  | -          | -      | -    | -      | -      | -    | -      | -      | -    |
| squamous cell carcinoma  | 193    | 4,849  | 4.0  | 16         | 1,005  | 1.1  | 4      | 204    | 2.0  | 9      | 495    | 1.8  |
| PANCREAS                 | 6,902  | 11,863 | 58.2 | 676        | 1,021  | 66.2 | 601    | 748    | 80.3 | -      | -      | -    |
| ductal adenocarcinoma    | 5,479  | 7,685  | 71.3 | 641        | 848    | 75.6 | 597    | 659    | 90.6 | 137    | 182    | 75.3 |
