# Supplementary material
Source: PubMed Central journal article supplement (PMC7367715)
Supplement: NIHMS1579935-supplement-4.pdf [file NIHMS1579935-supplement-4.pdf]

| cancer                                                                                                                                                                                                                                                                                                                                                                                                                                                                                                                                                                                                                                                                                                                                                                                                                                                                                                                                                                                                                                                                                                                                                                                                                                                                   | HRAS   |        |      |       |        | KRAS  |      |      |       |        | NRAS |      |       |       |        | mutation bias                  |         |         |       |
|--------------------------------------------------------------------------------------------------------------------------------------------------------------------------------------------------------------------------------------------------------------------------------------------------------------------------------------------------------------------------------------------------------------------------------------------------------------------------------------------------------------------------------------------------------------------------------------------------------------------------------------------------------------------------------------------------------------------------------------------------------------------------------------------------------------------------------------------------------------------------------------------------------------------------------------------------------------------------------------------------------------------------------------------------------------------------------------------------------------------------------------------------------------------------------------------------------------------------------------------------------------------------|--------|--------|------|-------|--------|-------|------|------|-------|--------|------|------|-------|-------|--------|--------------------------------|---------|---------|-------|
|                                                                                                                                                                                                                                                                                                                                                                                                                                                                                                                                                                                                                                                                                                                                                                                                                                                                                                                                                                                                                                                                                                                                                                                                                                                                          | G12*   | G13*   | Q61* | A146* | Others | G12*  | G13* | Q61* | A146* | Others | G12* | G13* | Q61*  | A146* | Others |                                | H       | K       | N     |
| GBM                                                                                                                                                                                                                                                                                                                                                                                                                                                                                                                                                                                                                                                                                                                                                                                                                                                                                                                                                                                                                                                                                                                                                                                                                                                                      | 0      | 0      | 1    | 0     | 7      | 8     | 0    | 1    | 1     | 4      | 4    | 0    | 7     | 0     | 0      | G12A                           | 11      | 872     | 94    |
| LGG                                                                                                                                                                                                                                                                                                                                                                                                                                                                                                                                                                                                                                                                                                                                                                                                                                                                                                                                                                                                                                                                                                                                                                                                                                                                      | 0      | 0      | 0    | 0     | 1      | 11    | 1    | 5    | 0     | 2      | 4    | 2    | 4     | 0     | 1      | <b>G12C</b>                    | 23      | 2,139   | 109   |
| HNSC                                                                                                                                                                                                                                                                                                                                                                                                                                                                                                                                                                                                                                                                                                                                                                                                                                                                                                                                                                                                                                                                                                                                                                                                                                                                     | 90     | 35     | 35   | 0     | 20     | 63    | 14   | 5    | 1     | 12     | 25   | 2    | 17    | 0     | 8      | <b>G12D</b>                    | 50      | 5,894   | 641   |
| THCA                                                                                                                                                                                                                                                                                                                                                                                                                                                                                                                                                                                                                                                                                                                                                                                                                                                                                                                                                                                                                                                                                                                                                                                                                                                                     | 16     | 6      | 56   | 0     | 7      | 29    | 10   | 21   | 0     | 18     | 5    | 2    | 255   | 0     | 17     | G12R                           | 4       | 886     | 32    |
| THCAA                                                                                                                                                                                                                                                                                                                                                                                                                                                                                                                                                                                                                                                                                                                                                                                                                                                                                                                                                                                                                                                                                                                                                                                                                                                                    | 9      | 0      | 37   | 0     | 1      | 15    | 7    | 9    | 0     | 0      | 1    | 0    | 126   | 0     | 4      | G12S                           | 68      | 640     | 198   |
| THCAF                                                                                                                                                                                                                                                                                                                                                                                                                                                                                                                                                                                                                                                                                                                                                                                                                                                                                                                                                                                                                                                                                                                                                                                                                                                                    | 9      | 9      | 21   | 0     | 1      | 46    | 15   | 9    | 0     | 1      | 6    | 1    | 137   | 0     | 0      | <b>G12V</b>                    | 150     | 4,097   | 89    |
| LUAD                                                                                                                                                                                                                                                                                                                                                                                                                                                                                                                                                                                                                                                                                                                                                                                                                                                                                                                                                                                                                                                                                                                                                                                                                                                                     | 0      | 2      | 2    | 0     | 3      | 3,573 | 239  | 81   | 7     | 263    | 8    | 0    | 51    | 0     | 13     | G13A                           | 0       | 14      | 12    |
| LUSC                                                                                                                                                                                                                                                                                                                                                                                                                                                                                                                                                                                                                                                                                                                                                                                                                                                                                                                                                                                                                                                                                                                                                                                                                                                                     | 0      | 3      | 4    | 0     | 1      | 159   | 7    | 13   | 0     | 14     | 1    | 0    | 8     | 0     | 1      | G13C                           | 6       | 162     | 31    |
| BRCA                                                                                                                                                                                                                                                                                                                                                                                                                                                                                                                                                                                                                                                                                                                                                                                                                                                                                                                                                                                                                                                                                                                                                                                                                                                                     | 14     | 3      | 9    | 0     | 12     | 73    | 22   | 9    | 0     | 4      | 3    | 1    | 12    | 0     | 6      | <b>G13D</b>                    | 22      | 1,448   | 336   |
| ESCA                                                                                                                                                                                                                                                                                                                                                                                                                                                                                                                                                                                                                                                                                                                                                                                                                                                                                                                                                                                                                                                                                                                                                                                                                                                                     | 2      | 0      | 2    | 0     | 3      | 32    | 9    | 1    | 1     | 9      | 0    | 0    | 1     | 0     | 1      | G13R                           | 58      | 26      | 123   |
| STAD                                                                                                                                                                                                                                                                                                                                                                                                                                                                                                                                                                                                                                                                                                                                                                                                                                                                                                                                                                                                                                                                                                                                                                                                                                                                     | 8      | 0      | 1    | 0     | 2      | 98    | 44   | 6    | 5     | 5      | 2    | 1    | 3     | 0     | 1      | G13S                           | 9       | 34      | 5     |
| SIAD                                                                                                                                                                                                                                                                                                                                                                                                                                                                                                                                                                                                                                                                                                                                                                                                                                                                                                                                                                                                                                                                                                                                                                                                                                                                     | 0      | 0      | 0    | 0     | 0      | 201   | 42   | 3    | 3     | 12     | 1    | 0    | 1     | 0     | 0      | G13V                           | 21      | 23      | 71    |
| COAD                                                                                                                                                                                                                                                                                                                                                                                                                                                                                                                                                                                                                                                                                                                                                                                                                                                                                                                                                                                                                                                                                                                                                                                                                                                                     | 0      | 2      | 0    | 0     | 11     | 2,216 | 582  | 46   | 50    | 86     | 25   | 8    | 44    | 0     | 18     | Q61E                           | 1       | 7       | 5     |
| READ                                                                                                                                                                                                                                                                                                                                                                                                                                                                                                                                                                                                                                                                                                                                                                                                                                                                                                                                                                                                                                                                                                                                                                                                                                                                     | 0      | 0      | 0    | 0     | 2      | 861   | 254  | 28   | 33    | 38     | 23   | 5    | 36    | 0     | 4      | Q61H                           | 17      | 318     | 208   |
| LIHC                                                                                                                                                                                                                                                                                                                                                                                                                                                                                                                                                                                                                                                                                                                                                                                                                                                                                                                                                                                                                                                                                                                                                                                                                                                                     | 0      | 0      | 1    | 0     | 1      | 13    | 6    | 3    | 0     | 5      | 0    | 0    | 9     | 0     | 0      | Q61K                           | 84      | 38      | 1,046 |
| CHOL                                                                                                                                                                                                                                                                                                                                                                                                                                                                                                                                                                                                                                                                                                                                                                                                                                                                                                                                                                                                                                                                                                                                                                                                                                                                     | 0      | 0      | 0    | 0     | 0      | 467   | 37   | 18   | 3     | 5      | 7    | 6    | 18    | 0     | 1      | Q61L                           | 87      | 64      | 323   |
| GBC                                                                                                                                                                                                                                                                                                                                                                                                                                                                                                                                                                                                                                                                                                                                                                                                                                                                                                                                                                                                                                                                                                                                                                                                                                                                      | 0      | 0      | 0    | 0     | 2      | 110   | 11   | 1    | 0     | 3      | 2    | 0    | 2     | 0     | 1      | Q61P                           | 2       | 15      | 38    |
| PAAD                                                                                                                                                                                                                                                                                                                                                                                                                                                                                                                                                                                                                                                                                                                                                                                                                                                                                                                                                                                                                                                                                                                                                                                                                                                                     | 0      | 0      | 0    | 0     | 0      | 5,172 | 65   | 130  | 2     | 110    | 1    | 1    | 2     | 0     | 5      | <b>Q61R</b>                    | 186     | 90      | 1,439 |
| KIRC                                                                                                                                                                                                                                                                                                                                                                                                                                                                                                                                                                                                                                                                                                                                                                                                                                                                                                                                                                                                                                                                                                                                                                                                                                                                     | 1      | 0      | 1    | 0     | 1      | 9     | 6    | 3    | 0     | 1      | 1    | 0    | 2     | 0     | 2      | A146G                          | 0       | 0       | 0     |
| BLCA                                                                                                                                                                                                                                                                                                                                                                                                                                                                                                                                                                                                                                                                                                                                                                                                                                                                                                                                                                                                                                                                                                                                                                                                                                                                     | 111    | 24     | 71   | 0     | 13     | 96    | 11   | 9    | 5     | 8      | 4    | 1    | 22    | 0     | 4      | A146V                          | 0       | 42      | 1     |
| PRAD                                                                                                                                                                                                                                                                                                                                                                                                                                                                                                                                                                                                                                                                                                                                                                                                                                                                                                                                                                                                                                                                                                                                                                                                                                                                     | 2      | 3      | 33   | 0     | 2      | 79    | 26   | 9    | 0     | 3      | 7    | 0    | 1     | 0     | 0      | A146E/D                        | 0       | 0       | 0     |
| OV                                                                                                                                                                                                                                                                                                                                                                                                                                                                                                                                                                                                                                                                                                                                                                                                                                                                                                                                                                                                                                                                                                                                                                                                                                                                       | 0      | 0      | 1    | 0     | 1      | 240   | 11   | 3    | 0     | 2      | 0    | 0    | 15    | 0     | 2      | A146P                          | 0       | 9       | 1     |
| UCEC                                                                                                                                                                                                                                                                                                                                                                                                                                                                                                                                                                                                                                                                                                                                                                                                                                                                                                                                                                                                                                                                                                                                                                                                                                                                     | 0      | 0      | 1    | 0     | 3      | 291   | 64   | 6    | 2     | 17     | 6    | 1    | 9     | 0     | 6      | A146S                          | 0       | 0       | 0     |
| CESC                                                                                                                                                                                                                                                                                                                                                                                                                                                                                                                                                                                                                                                                                                                                                                                                                                                                                                                                                                                                                                                                                                                                                                                                                                                                     | 21     | 0      | 2    | 0     | 1      | 69    | 9    | 5    | 0     | 2      | 0    | 0    | 4     | 0     | 1      | A146T                          | 1       | 111     | 8     |
| SKCM                                                                                                                                                                                                                                                                                                                                                                                                                                                                                                                                                                                                                                                                                                                                                                                                                                                                                                                                                                                                                                                                                                                                                                                                                                                                     | 2      | 5      | 25   | 1     | 4      | 27    | 3    | 8    | 2     | 16     | 127  | 93   | 1,692 | 7     | 67     | Others                         | 127     | 812     | 272   |
| ALL                                                                                                                                                                                                                                                                                                                                                                                                                                                                                                                                                                                                                                                                                                                                                                                                                                                                                                                                                                                                                                                                                                                                                                                                                                                                      | 0      | 0      | 1    | 0     | 3      | 140   | 75   | 3    | 15    | 32     | 195  | 89   | 61    | 3     | 10     | Total                          | 927     | 17,741  | 5,082 |
| AML                                                                                                                                                                                                                                                                                                                                                                                                                                                                                                                                                                                                                                                                                                                                                                                                                                                                                                                                                                                                                                                                                                                                                                                                                                                                      | 0      | 0      | 1    | 0     | 0      | 168   | 82   | 34   | 6     | 55     | 589  | 306  | 333   | 0     | 63     | <b>New patients/year (USA)</b> |         |         |       |
| CML                                                                                                                                                                                                                                                                                                                                                                                                                                                                                                                                                                                                                                                                                                                                                                                                                                                                                                                                                                                                                                                                                                                                                                                                                                                                      | 0      | 1      | 0    | 0     | 1      | 32    | 7    | 0    | 10    | 24     | 87   | 26   | 4     | 0     | 13     | cancer                         | K: G12C | K: G12D |       |
| PCM                                                                                                                                                                                                                                                                                                                                                                                                                                                                                                                                                                                                                                                                                                                                                                                                                                                                                                                                                                                                                                                                                                                                                                                                                                                                      | 0      | 0      | 1    | 0     | 2      | 49    | 26   | 56   | 14    | 33     | 16   | 27   | 155   | 0     | 11     | LUAD                           | 6,537   | 3,590   |       |
| <b>GBM</b> , glioblastoma multiforme; <b>LGG</b> , lower grade glioma; <b>HNSC</b> , head and neck squamous cell carcinoma; <b>THCA</b> , papillary thyroid carcinoma; <b>THCAA</b> , anaplastic thyroid carcinoma; <b>THCAF</b> , follicular thyroid carcinoma; <b>LUAD</b> , lung adenocarcinoma; <b>LUSC</b> , lung squamous cell carcinoma; <b>BRCA</b> , breast invasive carcinoma; <b>ESCA</b> , esophageal carcinoma; <b>STAD</b> , stomach adenocarcinoma; <b>SIAD</b> , small intestine adenocarcinoma; <b>COAD</b> , colon adenocarcinoma; <b>READ</b> , rectal adenocarcinoma; <b>LIHC</b> , liver hepatocellular carcinoma; <b>CHOL</b> , cholangiocarcinoma; <b>GBC</b> , gallbladder carcinoma; <b>PAAD</b> , pancreatic adenocarcinoma; <b>KIRC</b> , kidney renal clear cell carcinoma; <b>BLCA</b> , bladder urothelial carcinoma; <b>PRAD</b> , prostate adenocarcinoma; <b>OV</b> , ovarian serous cystadenocarcinoma; <b>UCEC</b> , uterine corpus endometrial carcinoma; <b>CESC</b> , cervical squamous carcinoma and endocervical adenocarcinoma; <b>SKCM</b> , skin cutaneous melanoma; <b>ALL</b> , acute lymphoblastic leukemia; <b>AML</b> , acute myeloid leukemia; <b>CML</b> , chronic myeloid leukemia; <b>PCM</b> , plasma cell myeloma. |        |        |      |       |        |       |      |      |       |        |      |      |       |       |        | COAD                           | 2,547   | 9,854   |       |
|                                                                                                                                                                                                                                                                                                                                                                                                                                                                                                                                                                                                                                                                                                                                                                                                                                                                                                                                                                                                                                                                                                                                                                                                                                                                          |        |        |      |       |        |       |      |      |       |        |      |      |       |       |        | READ                           | 1,196   | 5,904   |       |
|                                                                                                                                                                                                                                                                                                                                                                                                                                                                                                                                                                                                                                                                                                                                                                                                                                                                                                                                                                                                                                                                                                                                                                                                                                                                          |        |        |      |       |        |       |      |      |       |        |      |      |       |       |        | PAAD                           | 916     | 18,208  |       |
|                                                                                                                                                                                                                                                                                                                                                                                                                                                                                                                                                                                                                                                                                                                                                                                                                                                                                                                                                                                                                                                                                                                                                                                                                                                                          |        |        |      |       |        |       |      |      |       |        |      |      |       |       |        | UCEC                           | 915     | 3,202   |       |
|                                                                                                                                                                                                                                                                                                                                                                                                                                                                                                                                                                                                                                                                                                                                                                                                                                                                                                                                                                                                                                                                                                                                                                                                                                                                          |        |        |      |       |        |       |      |      |       |        |      |      |       |       |        | LUSC                           | 738     | 796     |       |
|                                                                                                                                                                                                                                                                                                                                                                                                                                                                                                                                                                                                                                                                                                                                                                                                                                                                                                                                                                                                                                                                                                                                                                                                                                                                          |        |        |      |       |        |       |      |      |       |        |      |      |       |       |        | THCAA                          | 615     | 769     |       |
|                                                                                                                                                                                                                                                                                                                                                                                                                                                                                                                                                                                                                                                                                                                                                                                                                                                                                                                                                                                                                                                                                                                                                                                                                                                                          |        |        |      |       |        |       |      |      |       |        |      |      |       |       |        | BLCA                           | 538     | 886     |       |
| PRAD                                                                                                                                                                                                                                                                                                                                                                                                                                                                                                                                                                                                                                                                                                                                                                                                                                                                                                                                                                                                                                                                                                                                                                                                                                                                     | 480    | 1,056  |      |       |        |       |      |      |       |        |      |      |       |       |        |                                |         |         |       |
| BRCA                                                                                                                                                                                                                                                                                                                                                                                                                                                                                                                                                                                                                                                                                                                                                                                                                                                                                                                                                                                                                                                                                                                                                                                                                                                                     | 431    | 928    |      |       |        |       |      |      |       |        |      |      |       |       |        |                                |         |         |       |
| All cancer                                                                                                                                                                                                                                                                                                                                                                                                                                                                                                                                                                                                                                                                                                                                                                                                                                                                                                                                                                                                                                                                                                                                                                                                                                                               | 19,926 | 60,990 |      |       |        |       |      |      |       |        |      |      |       |       |        |                                |         |         |       |
