# Supplementary material
Source: PubMed Central journal article supplement (PMC7367715)

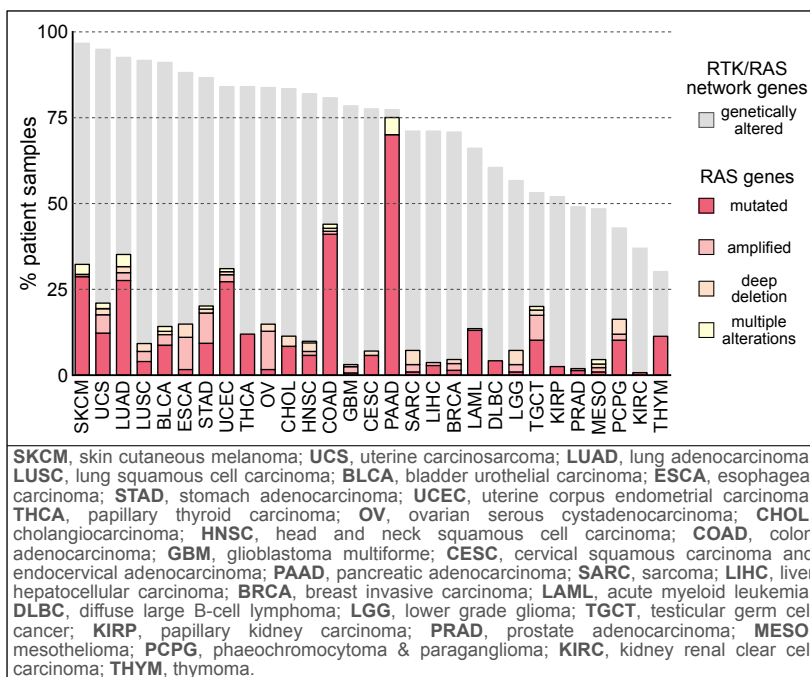

Supplement: NIHMS1579935-supplement-1.pdf [file NIHMS1579935-supplement-1.pdf]
